# Supplementary material
Source: Elsevier journal article supplement (https://comptes-rendus.academie-sciences.fr/mecanique/article/10.1016/j.crme.2010.06.004/file/attach/mmc1.pdf)
Supplement: mmc1 [file mmc1.pdf]

**Appendix to “Peristaltic transport of fourth grade fluid with heat transfer and induced magnetic field”, by T. Hayat, S. Noreen**

The purpose here is to present all the values appearing in the expressions of  $\Psi$ ,  $dp/dx$  and  $\phi$ . These are

$$\begin{aligned} C_1(y) = & (-1 + FM)y \cosh(3My) + (F + h) \cosh(M(h + 2y)) \\ & + y \cosh(M(2h + 3y)) + FM y \cosh(M(2h + 3y)) - F \cosh(M(h + 4y)) \\ & - h \cosh(M(h + 4y)) + (-1 + FM)y \sinh(3My) + (F + h) \sinh(M(h + 2y)) \\ & (1 + FM)y \sinh(M(2h + 3y)) - (F + h) \sinh(M(h + 4y)), \end{aligned}$$

$$\begin{aligned} C_2(y) = & -2My \cosh(3My) - 16My \cosh(3M(2h + y)) + 16My \cosh(M(2h + 3y)) \\ & + 48hM^2y \cosh(M(4h + 3y)) + 2My \cosh(M(8h + 3y)) - (1 + hM) \times \\ & (\cosh(3Mh) - \sinh(3Mh)) + (1 - hM) (\cosh(5Mh) - \sinh(5Mh)) \\ & - 2My \sinh(3My) - 16My \sinh(3M(h + 2y)), \end{aligned}$$

$$\begin{aligned} C_3(y) = & (1 + 3hM) (\cosh(M(h + 2y)) + \sinh(M(h + 2y))) + (1 + hM) \\ & (\cosh(3M(h + 2y)) + \sinh(3M(h + 2y))) + 12M(h^2M - y - Myh) \\ & \times (\cosh(M(3h + 2y)) + \sinh(M(3h + 2y))) - 12M(h^2M - y + Myh) \\ & \times (\cosh(M(5h + 2y)) + \sinh(M(5h + 2y))) + (-1 + 3hM) \\ & \times (\cosh(M(7h + 2y)) + \sinh(M(7h + 2y))), \end{aligned}$$

$$\begin{aligned} C_4(y) = & 16My \sinh(M(2h + 3y)) + 48hM^2 \sinh(M(4h + 3y)) - (-1 + 3hM) \\ & \times (\cosh(M(h + 4y)) + \sinh(M(h + 4y))) + 2My \sinh(M(8h + 3y)) \\ & - 12M (\cosh(M(3h + 4y)) + \sinh(M(3h + 4y))) (h^2M + y + hMy) \\ & + 12M (\cosh(M(5h + 4y)) + \sinh(M(5h + 4y))) (h^2M + y - hMy) \\ & + (\cosh(M(7h + 4y)) + \sinh(M(7h + 4y))) (1 - 3hM) + (-1 + hM) \\ & (\cosh(M(5h + 6y)) + \sinh(M(5h + 6y))), \end{aligned}$$

$$C_5(y) = (E - 2B_0FM) \cosh(Mh) + B_0(F + h)M \cosh(My) - (2B_0 + E) \sinh(Mh),$$

$$\begin{aligned}
C_6(y) = & -12(+B_0 + B_0hM + B_0(-1 + hM)(\cosh(2Mh) + \sinh(2Mh))) \\
& (\cosh(3Mh) + \sinh(3Mh))(-1 + (\cosh(M2y) + \sinh(M2y)))^2 \\
& (1 + (\cosh(2My) + \sinh(2My))) + 2B_0(12hM - 8\sinh(2Mh) + \sinh(4Mh)) \\
& (\cosh(M(4h + 3y)) + \sinh(M(4h + 3y))),
\end{aligned}$$

$$\begin{aligned}
C_7(y) = & 2(F + h)(\cosh(Mh) + \sinh(Mh)) - (\cosh(My) + \sinh(My))(2F + 2h \\
& + h^2M + h^2EM - Fh^2M^2 + h^3EM^2 - My^2 - hMy^2 + FM^2y^2 - hEM^2y^2) \\
& (\cosh(M(2h + y)) + \sinh(M(2h + y))) + 2(F + h) \\
& (\cosh(M(h + 2y)) + \sinh(M(h + 2y))),
\end{aligned}$$

$$\begin{aligned}
C_8(y) = & (1 + hM)(\cosh(3Mh) + \sinh(3Mh)) + (\cosh(5Mh) + \sinh(5Mh)) \\
& (-1 + hM)(\cosh(3My) + \sinh(3My))(2 + 8hM + 3h^2M^2 - 3M^2y^2) \\
& + 8(4 - 8hM + 3h^2M^2 - 3M^2y^2)(\cosh(3M(2h + y)) + \sinh(3M(2h + y))) \\
& - 3(1 + 3hM)(\cosh(M(h + 2y)) + \sinh(M(h + 2y))) + (1 + hM) \times \\
& (\cosh(3M(h + 2y)) + \sinh(3M(h + 2y))),
\end{aligned}$$

$$\begin{aligned}
C_9(y) = & -3(1 + 3hM)(\cosh(M(h + 4y)) + \sinh(M(h + 4y))) - 36(-1 - hM \\
& + h^2M^2 - My - hM^2y)(\cosh(M(3h + 2y)) + \sinh(M(3h + 2y))) + 36 \\
& (-1 - hM + h^2M^2 - My - hM^2y)(\cosh(M(5h + 2y)) + \sinh(M(5h + 2y))) \\
& + (3 - 9hM)(\cosh(M(7h + 2y)) + \sinh(M(7h + 2y))) - 8(4 + 8hM \\
& + 3h^2M^2 - 3M^2y^2)(\cosh(M(2h + 3y)) + \sinh(M(72h + 3y))) - 72hM^3 \\
& (h^2 - y^2)(\cosh(M(4h + 3y)) + \sinh(M(4h + 3y))),
\end{aligned}$$

$$\begin{aligned}
C_{10}(y) = & (\cosh(M(8h + 3y)) + \sinh(M(8h + 3y)))(-2 + 8hM - 3h^2M^2 + 3M^2y^2) \\
& - 36(-hM + h^2M^2 + My + hM^2y)(\cosh(M(8h + 3y)) + \sinh(M(8h + 3y))) \\
& + 36(\cosh(M(3h + 4y)) + \sinh(M(3h + 4y)))(-hM + h^2M^2 + My + hM^2y) \\
& (\cosh(M(5h + 4y)) + \sinh(M(5h + 4y)))(hM + h^2M^2 + My - hM^2y) \\
& (3 - 9hM)(\cosh(M(5h + 6y)) + \sinh(M(5h + 6y))),
\end{aligned}$$

$$\begin{aligned}
C_{11}(y) = & 4(2 + h^2M^2(-2 + Br(F + h)^2M^2) - Br(F + h)^2M^4y^2) \\
& (\cosh(2hM) + \sinh(2hM)) + (4 - 8hM + (4h^2 + Br(F + h)^2)M^2) \\
& Br(F + h)^2M^2(\cosh(2M(h + y)) + \sinh(2M(h + y))),
\end{aligned}$$

$$\begin{aligned}
C_{12}(y) = & (1 + hM) (\cosh(4hM) + \sinh(4hM)) + 5(-1 + hM) (\cosh(6hM) + \sinh(6hM)) \\
& (\cosh(4yM) + \sinh(4yM) (-1 + 7hM)) - 4 (\cosh(2M(h+y)) + \sinh(2M(h+y))) \\
& \times (1 + 3hM) - 16 (\cosh(4M(h+y)) + \sinh(4M(h+y))) (1 - 5hM + 18h^2M^2 \\
& + 12h^3M^3 + 12h^4M^4 - 12M^2y^2 - 12hM^3y^2 - 12h^2M^4y^2),
\end{aligned}$$

$$\begin{aligned}
C_{13}(y) = & 4(5 - 5hM + 12h^2M^2 + 12My - 12hM^2y) \\
& (\cosh(6M(h+y)) + \sinh(6M(h+y))) - (\cosh(2M(2h+y)) + \sinh(2M(2h+y))) \\
& \times 4(5 + 5hM + 12h^2M^2 + 12My - 12hM^2y) + (25 + 33hM - 16h^2M^2 + 48h^3M^3 \\
& + 16M^2y^2 - 48hM^3y^2) (\cosh(4M(2h+y)) + \sinh(4M(2h+y))) + (5 - 5hM + \\
& + 12h^2M^2 - 12My + 12hM^2y) + (\cosh(2M(4h+y)) + \sinh(2M(4h+y))) \\
& \times (4 - 12hM) + (25 - 33hM - 16h^2M^2 - 48h^3M^3 + 16M^2y^2 + 48hM^3y^2),
\end{aligned}$$

$$\begin{aligned}
C_{14}(y) = & 5(\cosh(4M(h+2y)) + \sinh(4M(h+2y))) (1 + hM) - 4(1 + 3hM) \\
& (\cosh(2M(h+3y)) + \sinh(2M(h+3y))) + 16(1 + 5hM + 18h^2M^2 - 12h^3M^3 \\
& + 12h^4M^4 - 12M^2y^2 + 12hM^3y^2 + 12h^2M^4y^2) \times (\cosh(M(6h+4y)) \\
& + \sinh(M(6h+4y))) + (1 + 7hM) (\cosh(M(10h+4y)) + \sinh(M(10h+4y))) \\
& + 4(5 + 5hM + 12h^2M^2 + 12My - 12hM^2y),
\end{aligned}$$

$$\begin{aligned}
C_{15}(y) = & 2(-162(F+h)M^{13}(h^2M+y+hMy) + 18Gr(F+h)^2M^7(-8-8hM+4h^2M^2 \\
& + 12h^3M^3 + 9h^5M^5 + 9h^3M^4y + 9h^4M^5y)\gamma - 3Gr^2(F+h)M^3(-41h^3M^2 + 40 \\
& \times h^4M^3 + 79h^5M^4 + 30h^6M^5 + 18h^8M^7 + 9(1+hM)(9-9h^2M^2+2h^6M^6)y \\
& - 54M^2(-1+hM)(1+hM)^2y^3 + 81M(-1+hM)(y+hMy)^2)\gamma^2 + Gr^3h^3 \\
& (-648(1+hM-h^2M^2) + 623h^3M^3 + 56h^4M^4 + 71h^5M^5 + 6h^6M^6 + 6h^8M^8 \\
& + 81My + 81hM^2y - 81h^2M^3y - 81h^3M^4y + 6h^6M^7y + 6h^7M^8y - 81M^2y^2 \\
& - 81hM^3y^2 + 81h^2M^4y^2 + 81h^3M^5y^2 + 54M^3y^3 + 54hM^4y^3 - 54h^2M^5y^3 \\
& - 54h^3M^6y^3)\gamma^3 (\cosh(M(3h+4y)) + \sinh(M(3h+4y))),
\end{aligned}$$

$$\begin{aligned}
C_{16}(y) = & -2(-162(F+h)^3 M^{13} (h^2 M + y - hMy) + 18Gr(F+h)^2 (8 - 8hM - 4h^2 M^2 \\
& + 12h^3 M^3 + 9h^5 M^5 + 9h^3 M^4 y - 9h^4 M^5 y) \gamma M^7 + 3Gr^2(F+h) M^3 (41h^3 M^2 \\
& + 40h^4 M^3 - 79h^5 M^4 + 30h^6 M^5 + 18h^8 M^7 - 9(-1+hM)(9-9h^2 M^2 + 2h^6) \\
& M^6) y - 81M(-1+hM)^2 (1+hM) y^2 + 54M^2(-1+hM)^2 + (1+hM) y^3) \gamma^2 \\
& + Gr^3 h^3 (-648 + 648hM + 648h^2 M^2 - 623h^3 M^3 + 56h^4 M^4 - 71h^5 M^5 + 6h^6 \\
& M^6 + 6h^8 M^8 + 81My - 81hM^2 y - 81h^2 M^3 y + 81h^3 M^4 y + 6h^6 M^7 y - 6h^7 M^8 y, \\
& -81M^2 y^2 + 81hM^3 y^2 + 81h^2 M^4 y^2 - 81h^3 M^5 y^2 + 54M^3 y^2 - 54hM^4 y^3 - 54h^2 \\
& M^5 y^3 + 54h^3 M^6 y^3) \gamma^3 (\cosh(M(5h+4y)) + \sinh(M(5h+4y))),
\end{aligned}$$

$$\begin{aligned}
C_{17}(y) = & (-27(F+h)^3 M^{12} (-1+3hM) + 9Gr(F+h)^2 M^7 (32 - 96hM + 112h^2 M^2 - \\
& 51h^3 M^3 + 9h^4 M^4) \gamma - 3Gr^2(F+h) M^3 (82h^3 M^2 - 192h^4 M^3 + 170h^5 M^4 \\
& - 63h^6 M^5 + 9h^7 M^6 - 54(-1+hM)^3 y + 54M(-1+hM)^3 y^2 - 36(-1+hM)^3 y^3 \\
& M^2) \gamma^2 + Gr^3 h^3 (-432 + M(1296h - 1296h^2 M + 482h^3 M^2 - 96h^4 M^3 + 58 \\
& h^5 M^4 - 13h^6 M^5 + 3h^7 M^6 - 54(1+hM)^3 y + 54M(-1+hM)^3 y^2 - 36M^2 \\
& (-1+hM)^3 y^3)) \gamma^3 (\cosh(M(7h+4y)) + \sinh(M(7h+4y)))
\end{aligned}$$

$$B_0 = \frac{1}{1+hM - \cosh(2hM) + hM \cosh(2hM) - \sinh(2hM) + hM \sinh(2hM)},$$

$$\begin{aligned}
B_1(y) = & (\cosh My + \sinh My + \cosh M(h+2y) + \sinh M(h+2y)) (-3FM^2 - 3hM^2 + Grh^3 \beta_1) \\
& \times 8 + (\cosh My + \sinh My) (24(F+h) M^2 + 12h^2 M^3 (1+L) - 12M^3 y^2 (1+L) - 12 \\
& (F-hL) h^2 M^4 + 12y^2 M^4 (F-hL) - 8Grh^3 \beta_1 - 5Grh^4 M \beta_1 - Grh^5 M^2 \beta_1 + Grh^2 y^2 \\
& \beta_1 M (6+2hM) - GrMy^4 \beta_1 (1+hM)) + (\cosh M(2h+y) + \sinh M(2h+y)) ((F+h) \\
& 24M^2 - 12h^2 M^3 (1+L+FM-LM) + 12M^3 y^2 (1+L+FM-hLM) - 8Grh^3 \beta_1 + \\
& 5Grh^4 M \beta_1 - Grh^5 M^2 \beta_1 - Grh^2 My^2 \beta_1 (6-2hM+GrMy^4 \gamma (1-hM))),
\end{aligned}$$

$$\begin{aligned}
B_2(y) = & -M^6 (3(F+h)M^2 - Grh^3\beta_1)^3 (\cosh 3Mh + \sinh 3Mh) + (\cosh 5Mh + \sinh 5Mh) \\
& (1+hM)M^6(-1+hM)(-3(F+h)M^2 + Grh^3\beta_1)^3 + (\cosh 3My + \sinh 3My) \\
& (-27M^{12}(F+h)^3(2+8hM+3M^2(h^2-y^2)) + 27GrM^7\beta_1(F+h)^2(10+ \\
& 40hM+70h^2M^2+54h^3M^3+20h^4M^4+3h^5M^5-4M^2y^2-16hM^3y^2- \\
& 12h^2M^4y^2-3h^3M^5y^2) + 9Gr^2M^2(F+h)(-378-1512hM-2457h^2M^2 \\
& -2180h^3M^3-1241h^4M^4-518h^5M^5-160h^6M^6-32h^7M^7-3h^8M^8+27 \\
& M^2y^2+108hM^3y^2+189h^2M^4y^2+170h^3M^5y^2+86h^4M^6y^2+24h^5M^7y^2 \\
& +3h^6M^8y^2)\beta_1^2 + Gr^3\beta_1^3(2430h^3+9234h^4M+13851h^5M^2+10722h^6 \\
& \times M^3+4899h^7M^4+1506h^8M^5+320h^9M^6+44h^{10}M^7+3h^{11}M^8-h^3y^2 \\
& 972h^2My^2+3321M^2-4212h^4M^3y^2-2511h^5M^4y^2-822h^6M^5y^2- \\
& 210h^7M^6y^2-36h^8M^7y^2-3h^9M^8y^2+162My^4+648hM^2y^4+972h^2M^3y^4 \\
& +648h^3M^4y^4+162h^4M^5y^4)),
\end{aligned}$$

$$\begin{aligned}
B_3(y) = & (11+6My)(Grh^3\beta_1-3(F+h)M^2)^2(\cosh M(2h+y)+\sinh M(2h+y)) \\
& 6GrM^3\beta_1-2(108M^{12}(F+h)^3(4-8hM+3(h^2-y^2)M^2)-54GrM^7(F+h)^2 \\
& (11(1-2hM)+11h^2M^2+10h^3M^3-22h^4M^4+6h^5M^5+10y^2M^2-20y^2hM^3) \\
& +6y^2h^2M^4-6y^2h^3M^5)\beta_1+9M^2Gr^2(F+h)(378-756hM+189h^2M^2+674h^3 \\
& M^3-889h^4M^4+494h^5M^5-102h^6M^6-20h^7M^7+12h^8M^8-27M^2y^2+54hM^3 \\
& \times y^2-27h^2M^4y^2-50h^3M^5y^2+46h^4y^2M^6-12h^5M^7y^2-12h^6M^8y^2)\beta_1^2+Gr^3 \\
& (-2430h^3+3888h^4M+729h^5M^2-4548h^6M^3+3831h^7M^4-1740h^8M^5+350 \\
& \times h^9M^6-40h^{10}M^7-12h^{11}M^8-1944h^2My^2+h^33321M^2y^2-162h^4M^3y^2- \\
& 1863h^5M^4y^2+858h^6M^5y^2-258h^7M^6y^2+72h^8M^7y^2+12h^9M^8y^2+324My^4 \\
& -648hM^2y^4+648h^3M^4y^4+324h^4M^5y^4)\gamma^3(\cosh 3M(2h+y) \\
& +\sinh 3M(2h+y)),
\end{aligned}$$

$$\begin{aligned}
B_4(y) = & 12M^3\beta_1 (h^2M^2 - 1) (Grh^3\beta_1 - 3(F+h)M^2)^2 (\cosh M(4h+y) + \sinh M(4h+y)) \\
& (11+6My)(1+hM)^2 Gr + 6(hM-1)^2 (\cosh M(6h+y) + \sinh M(6h+y)) \\
& (Grh^3\beta_1 - 3(F+h)M^2)^2 (11+6hM) GrM^3\beta_1 + 3(27M^{12}(F+h)^3(1+3hM) \\
& -9GrM^7\beta_1(F+h)^2(32+96hM+112h^2M^2+51h^3M^3+9h^4M^4) + 3Gr^2M^2 \\
& (F+h)(378+M(1134h+1134h^2M+460h^3M^2+192h^4M^3+170h^5M^4+ \\
& 63h^6M^5+9h^7M^6+378y(1+hM)^3+162My^2(1+hM)^3+36M^2(y+hMy)^3)) \\
& \beta_1^2 - Gr^3h^3(810+M(2430h+2430h^2M+860h^3M^2+96h^4M^3+58h^5M^4 \\
& +13h^6M^5+3h^7M^6+y(378+162My+36M^2y^2)(1+hM)^3))\beta_1^3 \\
& (\cosh M(h+2y) + \sinh M(h+2y)),
\end{aligned}$$

$$\begin{aligned}
B_5(y) = & -M^6(1+hM)(3(F+h)M^2 - Grh^3\beta_1)^3 (\cosh 3M(h+2y) + \sinh 3M(h+2y)) \\
& \times (h^2M^2 - 1) + 3(27M^{12}(F+h)^3(1+3hM) - 9Gr\beta_1M^7(F+h)^2(32+96hM \\
& +112h^2M^2+51h^3M^3+h^4M^4) + 3Gr^2\beta_1^2M^2(F+h)(378+M(1134h+1134 \\
& h^2M+460h^3M^2+192h^4M^3+170h^5M^4+63h^6M^5+h^7M^6 - y(378-162My \\
& +36M^2y^2)(1+hM)^3)) - \gamma^3Gr^3h^3(810+M(2430h+2430h^2M+860h^3 \\
& M^2+96h^4M^3+58h^5M^4+13h^6M^5+3h^7M^6 - y(378-162My+36M^2y^2) \\
& (1+hM)^3)) (\cosh M(h+4y) + \sinh M(h+4y)),
\end{aligned}$$

$$\begin{aligned}
B_6(y) = & -6(-162M^{12}(F+h)^3(-1-hM+h^2M^2-My-hyM^2) + 18GrM^7\beta_1(F+h)^2 \\
& (-8-8hM+4h^2M^2+3h^3M^3-9h^4M^4+9h^5M^5-9h^3M^4y(1+hM)) + 3Gr^2 \\
& M^2(-F-h)\gamma^2(-567-567hM+567h^2M^2+526h^3M^3+40h^4M^4+79h^5M^5 \\
& +12h^6M^6-18h^7M^7+18h^8M^8-567My(1+Mh-h^2M^2-h^3M^3)-18h^6M^7y \\
& (1+hM)-243y^2(1+hM-h^2M^2-h^3M^3)M^2-54(1+hM-h^2M^2-h^3M^3)) \\
& M^3y^3 + Gr^3h^3(-1215+M(-1215h(1-hM)+h^31190M^2+56h^4M^3+71h^5 \\
& M^4-6h^7M^6+6M^7h^8-3(189-189h^2M^2+2h^6M^6)y(1+hM)+54(hM-1) \\
& \times M^2y^3(1+hM)^2+243M(hM-1)(y+yhM^2))\beta_1^3 \\
& (\cosh M(3h+2y) + \sinh M(3h+2y)),
\end{aligned}$$

$$\begin{aligned}
B_7(y) = & 6(-162M^{12}(F+h)^3(-1+hM+h^2M^2-My+hyM^2)+18GrM^7\beta_1(F+h)^2 \\
& ((8-8hM-4h^2M^2+3h^3M^3+9h^4M^4+9h^5M^5-9h^3M^4y(1-hM))+3Gr^2M^2 \\
& (-F-h)\beta_1^2(-567+567hM+567h^2M^2-526h^3M^3+40h^4M^4-79h^5M^5+12h^6 \\
& M^6+18h^7M^7+18h^8M^8-567My(1-Mh-h^2M^2+h^3M^3)-18h^6M^7y(1-hM) \\
& -243(1-hM-h^2M^2+h^3M^3)y^2M^2-54M^3y^3(1-hM-h^2M^2+h^3M^3))+Gr^3 \\
& h^3(-1215(1-hM-h^2M^2)-1190h^3M^3+56h^4M^4-71h^5M^5+6h^7M^7+6h^8 \\
& M^8-567My(1-Mh-h^2M^2+h^3M^3)-(1-hM-h^2M^2+h^3M^3)-6(1-hM) \\
& h^6My+243M^2y^2-54(1-hM-h^2M^2+h^3M^3)M^3y^3)\beta_1^3) \\
& (\cosh M(5h+2y)+\sinh M(5h+2y)),
\end{aligned}$$

$$\begin{aligned}
B_8(y) = & -3(-27M^{12}(F+h)^3(3hM-1)+9GrM^7\beta_1(F+h)^2(32-96hM+112h^2M^2-51 \\
& h^3M^3+9h^4M^4)-3Gr^2M^2(F+h)\beta_1^2(-378+M(1134h(1-hM)+460h^3M^2- \\
& 192h^4M^3+170h^5M^4-63h^6M^5+9h^7M^6+y(378+162My+36M^2y^2))) \\
& (hM-1)^3+Gr^3h^3\times(-810+M(2430h(1-hM)+860h^3M^2-96h^4M^3+58h^5 \\
& M^4-13h^6M^5+3h^7M^6+y(hM-1)^3(378+162My+36M^2y^2)))\beta_1^3) \\
& (\cosh M(7h+2y)+\sinh M(7h+2y)),
\end{aligned}$$

$$\begin{aligned}
B_9(y) = & -2(-108M^{12}(F+h)^3(4+8hM+3h^2M^2-3M^2y^2)+54GrM^7\beta_1(F+h)^2 \\
& (-11-22hM-11h^2M^2+10h^3M^3+22h^4M^4+6h^5M^5-10M^2y^2-20 \\
& hM^3y^2-6h^2M^4y^2(1+hM))+9Gr^2M^2(F+h)\beta_1^2(-378-756hM- \\
& 189h^2M^2+674h^3M^3+889h^4M^4+494h^5M^5+102h^6M^6-20h^7M^7 \\
& -12h^8M^8+27M^2y^2+54hM^3y^2+27h^2M^4y^2-50h^3M^5y^2-46y^2M^6 \\
& h^4-12h^5M^7y^2+12h^6M^8y^2)+Gr^3\beta_1^3(2430h^3+3888h^4M-729h^5 \\
& M^2-4548h^6M^3-3831h^7M^4-1740h^8M^5-350h^9M^6-40h^{10}M^7+ \\
& 12h^{11}M^8-1944My^2h^2-M^23321h^3y^2-162h^4M^3y^2+1863h^5M^4y^2 \\
& +858h^6M^5y^2+258h^7M^6y^2+72h^8M^7y^2-12h^9M^8y^2+324My^4)) \\
& +(1+2hM-2h^3M^3-h^4M^4))(\cosh M(2h+3y)+\sinh M(2h+3y)),
\end{aligned}$$

$$\begin{aligned}
B_{10}(y) = & -36M(-54hM^{14}(F+h)^3(h^2-y^2) + 27GrM^6\beta_1(F+h)^2(3-3h^2M^2+2h^4 \\
& (1+h^2M^2)M^4 + 2y^2M^2 - 2h^2y^2M^4 - 2h^4M^6y^2) - (28-27h^2M^2+2h^6M^6 \\
& \times -3M^2y^2 - 2h^6M^4y^2)9Gr^2h^3M^4\beta_1^2(F+h) + Gr^3\beta_1^3(81h^4+21h^6M^2-99 \\
& h^8M^4 - 6h^{10}M^6 + 2h^{12}M^8 + 162h^2y^2 - 216h^4M^2y^2 + 39y^2h^6M^4 + 6h^8M^6 \\
& y^2 - 2h^{10}M^8y^2 - 27y^4 + 54h^2M^2y^4 - 27 \times y^4M^4h^4)) \\
& (\cosh M(4h+3y) + \sinh M(4h+3y)),
\end{aligned}$$

$$\begin{aligned}
B_{11}(y) = & (27M^{12}(F+h)^3(2-8hM+3h^2M^2-3M^2y^2) + 27GrM^7\beta_1(F+h)^2(10 \\
& -40hM+70h^2M^2-54h^3M^3+20h^4M^4-3h^5M^5-4M^2y^2+16h-12h^2 \\
& M^4y^2+3h^3M^5y^2) + 9Gr^2M^2(F+h)\gamma^2(378-1512hM+2457h^2M^2 \\
& -2180h^3M^3+1241h^4M^4-518h^5M^5+160h^6M^6-32h^7M^7+3h^8M^8 \\
& -27M^2y^2+108hM^3y^2-189h^2M^4y^2+170h^3M^5y^2-86y^2M^6h^4+24 \\
& h^5M^7y^2-3h^6M^8y^2) + Gr^3\beta_1^3-2430h^3+9234h^4M-13851h^5M^2+ \\
& 10722h^6M^3-4899h^7M^4+1506h^8M^5-320h^9M^6+44h^{10}M^7-3h^{11} \\
& M^8-972My^2h^2+3321h^3M^2y^2-4212h^4M^3y^2+2511h^5M^4y^2-822 \\
& h^6M^5y^2+210h^7M^6y^2-36h^8M^7y^2+3h^9M^8y^2+162My^4-648hM^2 \\
& y^4+972h^2M^3y^4-648h^3y^4M^4+162h^4M^5y^4)) \times \\
& (\cosh M(8h+3y) + \sinh M(8h+3y)),
\end{aligned}$$

$$\begin{aligned}
B_{12}(y) = & -6(-162M^{12}(F+h)^3(-1-hM+h^2M^2+My+hM^2y) + 18GrM^7\beta_1(F+h)^2 \\
& (-8-8hM+4h^2M^2+3h^3M^3-9h^4M^4+9h^5M^5+9h^4M^5y) + 3Gr^2M^2 \\
& (-F-h)\beta_1^2(-567-567hM+567h^2M^2+526h^3M^3+40h^4M^4+79h^5M^5 \\
& +12h^6M^6-18h^7M^7+18h^8M^8+567My \times (1+hM-h^2M^2-h^3M^3) + \\
& 18h^6M^7y(1+hM) - 243M^2y^2(1+hM-h^2M^2-h^3M^3) + 54M^3y^3 \\
& (1+hM-h^2M^2-h^3M^3)) + Gr^3h^3\beta_1^3-1215+M-1215h(1-hM) + \\
& 1190h^3M^2+56h^4M^3+71h^5M^4-6h^7M^6+6h^8M^7+3(189-189h^2M^2+2h^6M^6) \\
& (1+hM)y-54M^2(hM-1)(1+hM)^2y^3+243M(hM-1)(y+yhM^2))) \times \\
& (\cosh M(3h+4y) + \sinh M(3h+4y)),
\end{aligned}$$



$$\begin{aligned}
B_{13}(y) = & 6(-162M^{12}(F+h)^3(-1+hM+h^2M^2+My-hM^2y)+18GrM^7\beta_1(F+h)^2 \\
& (8-8hM-4h^2M^2+3h^3M^3+9h^4M^4+9h^5M^5+9h^3M^4y-9h^4M^5\beta_1)+3 \\
& Gr^2M^2(-F-h)\beta_1^2(-567+567hM(1+hM)-526h^3M^3+40h^4M^4-79h^5 \\
& M^5+12h^6M^6+18h^7M^7+18h^8M^8+M567y(1-hM-h^2M^2+h^3M^3)+18h^6 \\
& M^7y(1-hM)-243M^2y^2(1-hM-h^2M^2+h^3M^3)+(1-hM-h^2M^2+h^3M^3)) \\
& 54M^3y^3+Gr^3h^3\beta_1^3(-1215(1-hM-h^2M^2)-1190h^3M^3+56h^4M^4-71h^5M^5 \\
& +6h^7M^7+6h^8M^8+567My(1-hM-h^2M^2+h^3M^3)+6h^6M^7y- \\
& 6h^7M^8y-243M^2y^2(1-hM-h^2M^2+h^3M^3)+54M^3y^3-(1+hM-h^2M^2))) \\
& 54hM^4y^3(\cosh M(5h+4y)+\sinh M(5h+4y)),
\end{aligned}$$

$$\begin{aligned}
B_{14}(y) = & -3(-27M^{12}(F+h)^3(-1+3hM)+9GrM^7\beta_1(F+h)^2(32-96hM+112h^2M^2 \\
& -51h^3M^3+9h^4M^4)+3Gr^2M^2(F+h)\beta_1^2(378+M(-1134h(1-hM)-460h^3 \\
& M^2+192h^4M^3-h^5+170M^4+63h^6M^5-9h^7M^6+(378-162My+36M^2y^2))) \\
& y(hM-1)^3+Gr^3h^3\beta_1^3\times(-810+M(2430h(1-hM)+860h^3M^2-96h^4M^3+ \\
& 58h^5M^4-13h^6M^5+3h^7M^6-y\times(hM-1)^3(378-162yM-36y^2M^2))) \\
& (\cosh M(7h+4y)+\sinh M(7h+4y)),
\end{aligned}$$

$$\begin{aligned}
B_{15}(y) = & -6Gr(1+Mh)^2(Grh^3\beta_1-3M^2(F+h))^2(\cosh M(2h+5y)+\sinh M(2h+5y)) \\
& +(\cosh M(4h+5y)+\sinh M(4h+5y))(-11+6hM)M^3\beta_1-12(Grh^3\beta_1-3M^2(F+h))^2 \\
& GrM^3\beta_1(M^2h^2-1)(-11+6yM)-6GrM^3\beta_1(Grh^3\gamma-3M^2(F+h))^2 \\
& \times(\cosh M(6h+5y)+\sinh M(6h+5y))(-1+Mh)^2(-11+6yM) \\
& +(Grh^3\beta_1-3M^2(F+h))^2(\cosh M(5h+6y)+\sinh M(5h+6y)) \\
& \times M^6(-1+Mh),
\end{aligned}$$

$$\begin{aligned}
L_1(y) = & (1+hM)^3(3GrM^2+3GrhM^3+3M^4+3EM^4-3FM^5+3hEM^5-3Gr\beta_1-Gr \\
& \times 3\beta_1-3GrhM\beta_1+Grh^3M^3\beta_1(\cosh(3My)-\sinh(3My))+2(-1+hM)^2(-6Gr \\
& M^2-6M^4+6GrM^4h^2-6EM^4-3FM^5-3hM^5-6FhM^6+6h^2EM^6+6Gr\beta_1- \\
& 6Grh^2M^2\beta_1+Grh^3M^3\beta_1+2GrM^4h^4\beta_1)(\cosh(3M(2h+y))-\sinh(3M(2h+y))),
\end{aligned}$$

$$\begin{aligned}
L_2(y) = & (\cosh(M(2h+3y)) - \sinh(M(2h+3y))) (-6GrM^2 - 6M^4 + 6GrM^4h^2 - 6EM^4 + 3h \\
& M^5 + 3FM^5 + 6FhM^6 + 6h^2EM^6 + 6Gr\beta_1 - 6Grh^2M^2\beta_1 + Grh^3M^3\beta_1 + 2GrM^4h^4\beta_1) \\
& 2(-1+hM)^2 + 6(\cosh(M(4h+3y)) - \sinh(M(4h+3y))) (-1+h^2M^2) (-3GrM^2 - \\
& 3M^4 + 3GrM^4h^2 - 3EM^4 - 3FhM^6 + 3h^2EM^6 + 3Gr\beta_1 - 3Grh^2M^2\beta_1 + Grh^4M^4\beta_1) \\
& + (-1+hM)^3 (-3GrM^2 + 3GrhM^3 - 3M^4 - 3EM^4 - 3FM^5 + 3hEM^5 + 3Gr\beta_1 - Gr \\
& 3hM\beta_1 + Grh^3M^3\beta_1) (\cosh(M(8h+3y)) - \sinh(M(8h+3y))),
\end{aligned}$$

$$\begin{aligned}
L_3(y) = & -27(F+h)^3M^{15} + 9Gr(F+h)^2M^{10}(4+16hM+12h^2M^2+3h^3M^3)\beta_1 - 3Gr^2M^5 \\
& (F+h)(27+108hM+189h^2M^2+170h^3M^3+86h^4M^4+24h^5M^5+3h^6M^6)\beta_1^2 \\
& + Gr^3(648+2592hM+4212h^2M^2+3699h^3M^3+2052h^4M^4+837h^5M^5+274 \\
& \times h^6M^6+70h^7M^7+12h^8M^8+h^9M^9)\beta_1^3 (\cosh(3My) + \sinh(3My)) - 2(108 \\
& (F+h)^3M^{15} - 36Gr(F+h)^2M^{10}(-14+28hM-12h^2M^2+3h^3M^3)\beta_1 + 3Gr^2M^5 \\
& (F+h)(27-54hM+27h^2M^2-22h^3M^3+98h^4M^4-60h^5M^5+12h^6M^6)\beta_1^2,
\end{aligned}$$

$$\begin{aligned}
L_4(y) = & (+1296 - 2592hM + 648h^2M^2 + 1485h^3M^3 - 1242h^4M^4 + 621h^5M^5 - 250h^6 \\
& M^6 + 14h^7M^7 - 12h^8M^8 + 4h^9M^9)\beta_1^3 (\cosh(3M(2h+y)) + \sinh(3M(2h+y))) \\
& Gr^3 - 2(-108(F+h)^3M^{15} + 36Gr(F+h)^2M^{10}(14+28hM+12h^2M^2+3h^3M^3) \\
& \times \beta_1 + 3Gr^2M^5(27+54hM+27h^2M^2+22h^3M^3+98h^4M^4+60h^5M^5+12h^6M^6) \\
& \beta_1^2(F+h) + Gr^3(\cosh(M(2h+3y)) + \sinh(M(2h+3y)))(1296+2592hM \\
& +648h^2M^2-1485h^3M^3-1242h^4M^4-621h^5M^5-250h^6M^6-144h^7M^7+12 \\
& h^8M^8+4h^9M^9)\beta_1^3,
\end{aligned}$$

$$\begin{aligned}
L_5(y) = & -12(-54h(F+h)^3 M^{16} + 54Gr(F+h)^2 M^{10}(-3 + 3h^2 M^2 + h^4 M^4) \beta_1 - 9(F+h) \\
& Gr^2 h^3 M^8(-5 + 8h^2 M^2 + 2h^4 M^4) \beta_1^2 + Gr^3(-324 + 486h^2 M^2 - 108h^4 M^4 - 51 \\
& h^6 M^6 + 6h^8 M^8 + 2h^{10} M^{10}) \beta_1^2) (\cosh(M(4h+3y)) + \sinh(M(4h+3y))) \\
& + (27(F+h)^3 M^{15} - 9Gr(F+h)^2 M^{10}(-4 + 16hM - 12h^2 M^2 + 3h^3 M^3) \beta_1 \\
& + 3Gr^2 M^5(27 - 108hM + 189h^2 M^2 - 170h^3 M^3 + 86h^4 M^4 - 24h^5 M^5 + 3h^6 M^6) \\
& \beta_1^2(F+h) - Gr^3(\cosh(M(4h+3y)) + \sinh(M(4h+3y)))(-648 + 2592hM \\
& - 4212h^2 M^2 + 3699h^3 M^3 - 2052h^4 M^4 + 837h^5 M^5 - 274h^6 M^6 + 70h^7 M^7 \\
& - 12h^8 M^8 + h^9 M^9) \beta_1^3).
\end{aligned}$$
